# Supplementary material
Source: publisher figshare collection journal article supplement (https://gsapubs.figshare.com/articles/dataset/_/14417636)
Supplement: Supplementary file 1 [file 1]

Bernhardt, H., and Williams, D.A., 2021, Pityusa Patera, Mars: Structural analyses suggest a mega-caldera above a magma chamber at the crust-mantle interface: *Geology*, v. 49, <https://doi.org/10.1130/G48903.1>

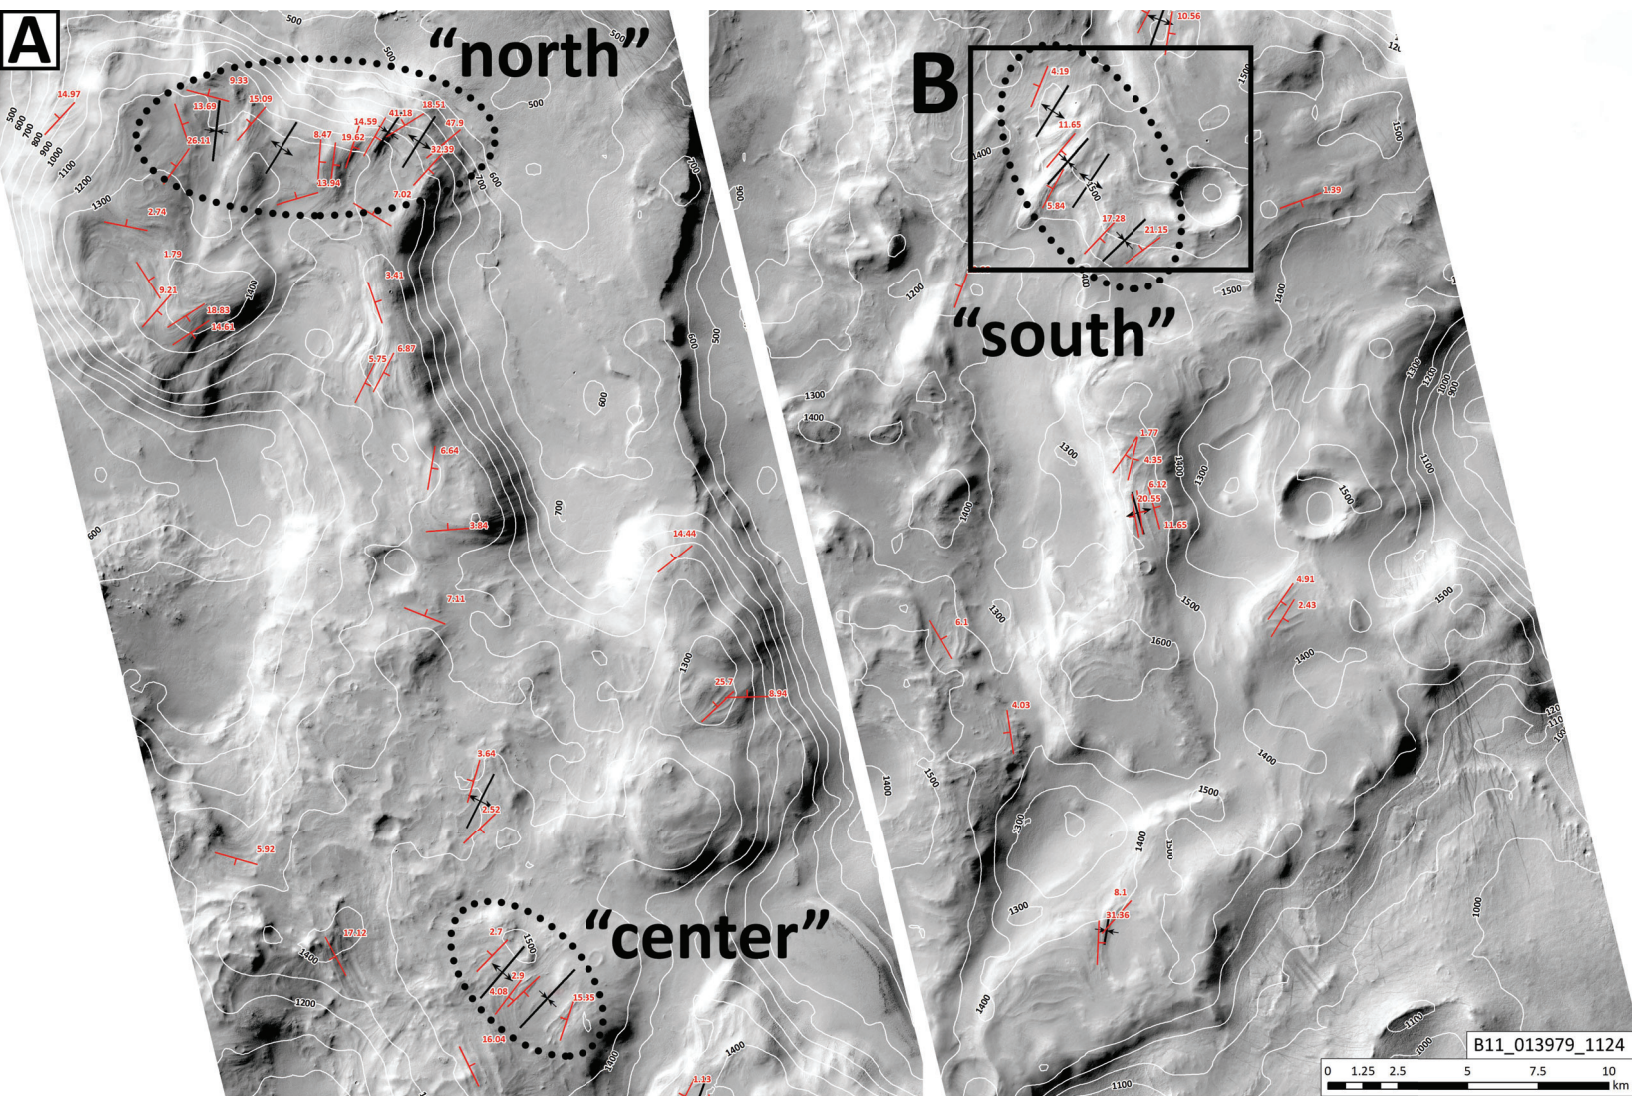

Figure S1
